# Supplementary material
Source: publisher figshare collection journal article supplement (https://acs.figshare.com/ndownloader/files/7898848)
Supplement: Supplementary file 1 [file 7898848]

188
(1) [Pt(ppy)(CN)2Cu(PPh3)2]2
C     2.4605465    0.3125007    1.4459394
C     2.4303563    0.0630467   -1.3261857
C     5.3089407    0.8474547    1.4084241
C     5.2552248    0.9162456    2.8090875
H     4.2974309    0.7735070    3.3190619
C     6.3961016    1.1631444    3.5732648
H     6.3173669    1.2126515    4.6646952
C     7.6368920    1.3477272    2.9576627
H     8.5316586    1.5394206    3.5574575
C     7.7259178    1.2869792    1.5719700
H     8.7002384    1.4325036    1.0951199
C     6.5781965    1.0418603    0.8030845
C     6.5983715    0.9818665   -0.6593813
C     7.7293507    1.1741560   -1.4636370
H     8.6954786    1.3695834   -0.9956500
C     7.6184971    1.1234677   -2.8463904
H     8.5020198    1.2760875   -3.4737769
C     6.3703121    0.8849772   -3.4200548
H     6.2228872    0.8500064   -4.5016641
C     5.2848573    0.6940778   -2.5758544
H     4.2831176    0.5091394   -2.9716571
C     1.8370945   -1.6640684   -5.8338862
C     2.9441644   -1.7515396   -4.9745164
H     2.7891893   -1.7561487   -3.8904441
C     4.2352812   -1.8235234   -5.4928936
H     5.0877265   -1.9048016   -4.8108727
C     4.4418492   -1.7837299   -6.8738939
H     5.4568629   -1.8361411   -7.2802935
C     3.3487310   -1.6783598   -7.7324313
H     3.5015214   -1.6462877   -8.8158278
C     2.0517867   -1.6246198   -7.2167805
H     1.2004550   -1.5530304   -7.8999850
C    -0.9540244   -1.4239660   -6.5099614
C    -1.4261002   -2.5406125   -7.2136491
H    -1.1433634   -3.5478532   -6.8933945
C    -2.2634052   -2.3764417   -8.3164020
H    -2.6293500   -3.2566574   -8.8542203
C    -2.6378024   -1.0971825   -8.7303041
H    -3.2982990   -0.9718418   -9.5940479
C    -2.1771899    0.0191758   -8.0330175
H    -2.4747318    1.0271814   -8.3372751
C    -1.3456460   -0.1450008   -6.9253945
H    -1.0103107    0.7347689   -6.3679419
C    -1.0812739    3.0333128   -5.0121017
C    -0.7089695    3.8389265   -6.0940934
H     0.3433824    4.0952274   -6.2484364
C    -1.6759604    4.3216932   -6.9793031
H    -1.3719853    4.9526753   -7.8205725
C    -3.0213363    4.0102913   -6.7886259
H    -3.7778521    4.3941526   -7.4802437
C    -3.3998589    3.2058089   -5.7108844
H    -4.4529546    2.9526483   -5.5546947
C    -2.4372088    2.7141297   -4.8333625
H    -2.7378099    2.0703115   -3.9990330
C    -0.2409833    3.3371188   -2.3112569
C    -0.5865317    4.6939142   -2.4053274
H    -0.6628362    5.1729137   -3.3868594
C    -0.8457509    5.4342256   -1.2538605
H    -1.1165030    6.4915902   -1.3379758
C    -0.7712977    4.8258930    0.0013148
H    -0.9791425    5.4040238    0.9071843
C    -0.4396341    3.4758185    0.1016338
H    -0.3926388    2.9850064    1.0782303
C    -0.1761516    2.7328420   -1.0496326
H     0.0702688    1.6717728   -0.9625389
N     1.6240851    0.2483622    2.2561724
N     1.6154078   -0.1391209   -2.1371517
N     5.3950485    0.7313153   -1.2419482
Cu    0.0151260    0.0156327   -3.3764733
Pt    3.8164273    0.4661699    0.0862731
P     0.1708901   -1.5582869   -5.0616590
P     0.0996743    2.3160286   -3.7975927
C    -2.4605465   -0.3125007   -1.4459394
C    -2.4303563   -0.0630467    1.3261857
C    -5.3089407   -0.8474547   -1.4084241
C    -5.2552248   -0.9162456   -2.8090875
H    -4.2974309   -0.7735070   -3.3190619
C    -6.3961016   -1.1631444   -3.5732648
H    -6.3173669   -1.2126515   -4.6646952
C    -7.6368920   -1.3477272   -2.9576627
H    -8.5316586   -1.5394206   -3.5574575
C    -7.7259178   -1.2869792   -1.5719700
H    -8.7002384   -1.4325036   -1.0951199
C    -6.5781965   -1.0418603   -0.8030845
C    -6.5983715   -0.9818665    0.6593813
C    -7.7293507   -1.1741560    1.4636370
H    -8.6954786   -1.3695834    0.9956500
C    -7.6184971   -1.1234677    2.8463904
H    -8.5020198   -1.2760875    3.4737769
C    -6.3703121   -0.8849772    3.4200548
H    -6.2228872   -0.8500064    4.5016641
C    -5.2848573   -0.6940778    2.5758544
H    -4.2831176   -0.5091394    2.9716571
C    -1.8370945    1.6640684    5.8338862
C    -2.9441644    1.7515396    4.9745164
H    -2.7891893    1.7561487    3.8904441
C    -4.2352812    1.8235234    5.4928936
H    -5.0877265    1.9048016    4.8108727
C    -4.4418492    1.7837299    6.8738939
H    -5.4568629    1.8361411    7.2802935
C    -3.3487310    1.6783598    7.7324313
H    -3.5015214    1.6462877    8.8158278
C    -2.0517867    1.6246198    7.2167805
H    -1.2004550    1.5530304    7.8999850
C     0.9540244    1.4239660    6.5099614
C     1.4261002    2.5406125    7.2136491
H     1.1433634    3.5478532    6.8933945
C     2.2634052    2.3764417    8.3164020
H     2.6293500    3.2566574    8.8542203
C     2.6378024    1.0971825    8.7303041
H     3.2982990    0.9718418    9.5940479
C     2.1771899   -0.0191758    8.0330175
H     2.4747318   -1.0271814    8.3372751
C     1.3456460    0.1450008    6.9253945
H     1.0103107   -0.7347689    6.3679419
C     1.0812739   -3.0333128    5.0121017
C     0.7089695   -3.8389265    6.0940934
H    -0.3433824   -4.0952274    6.2484364
C     1.6759604   -4.3216932    6.9793031
H     1.3719853   -4.9526753    7.8205725
C     3.0213363   -4.0102913    6.7886259
H     3.7778521   -4.3941526    7.4802437
C     3.3998589   -3.2058089    5.7108844
H     4.4529546   -2.9526483    5.5546947
C     2.4372088   -2.7141297    4.8333625
H     2.7378099   -2.0703115    3.9990330
C     0.2409833   -3.3371188    2.3112569
C     0.5865317   -4.6939142    2.4053274
H     0.6628362   -5.1729137    3.3868594
C     0.8457509   -5.4342256    1.2538605
H     1.1165030   -6.4915902    1.3379758
C     0.7712977   -4.8258930   -0.0013148
H     0.9791425   -5.4040238   -0.9071843
C     0.4396341   -3.4758185   -0.1016338
H     0.3926388   -2.9850064   -1.0782303
C     0.1761516   -2.7328420    1.0496326
H    -0.0702688   -1.6717728    0.9625389
N    -1.6240851   -0.2483622   -2.2561724
N    -1.6154078    0.1391209    2.1371517
N    -5.3950485   -0.7313153    1.2419482
Cu   -0.0151260   -0.0156327    3.3764733
Pt   -3.8164273   -0.4661699   -0.0862731
P    -0.1708901    1.5582869    5.0616590
P    -0.0996743   -2.3160286    3.7975927
C     0.1279385    3.2802848    4.4902535
C    -0.6391832    4.3762863    4.9058913
C     1.2005580    3.4893375    3.6110783
C    -0.3307279    5.6613993    4.4577854
H    -1.4852543    4.2274022    5.5833435
C     1.5117815    4.7754814    3.1732819
H     1.7859700    2.6358155    3.2534958
C     0.7473798    5.8639574    3.5959036
H    -0.9381637    6.5101593    4.7875984
H     2.3497350    4.9221509    2.4853552
H     0.9884314    6.8727327    3.2461937
C    -0.1279385   -3.2802848   -4.4902535
C     0.6391832   -4.3762863   -4.9058913
C    -1.2005580   -3.4893375   -3.6110783
C     0.3307279   -5.6613993   -4.4577854
H     1.4852543   -4.2274022   -5.5833435
C    -1.5117815   -4.7754814   -3.1732819
H    -1.7859700   -2.6358155   -3.2534958
C    -0.7473798   -5.8639574   -3.5959036
H     0.9381637   -6.5101593   -4.7875984
H    -2.3497350   -4.9221509   -2.4853552
H    -0.9884314   -6.8727327   -3.2461937
C     1.7412715    2.8844108   -4.3946247
C     2.4720177    3.9128237   -3.7879808
C     2.3079340    2.2020928   -5.4824204
C     3.7341244    4.2630602   -4.2712984
H     2.0560133    4.4409692   -2.9255635
C     3.5601451    2.5633282   -5.9749977
H     1.7678070    1.3696243   -5.9462305
C     4.2776514    3.5966322   -5.3685823
H     4.2956408    5.0651982   -3.7824830
H     3.9803033    2.0227268   -6.8289944
H     5.2653254    3.8776151   -5.7476646
C    -1.7412715   -2.8844108    4.3946247
C    -2.3079340   -2.2020928    5.4824204
C    -2.4720177   -3.9128237    3.7879808
C    -3.5601451   -2.5633282    5.9749977
H    -1.7678070   -1.3696243    5.9462305
C    -3.7341244   -4.2630602    4.2712984
H    -2.0560133   -4.4409692    2.9255635
C    -4.2776514   -3.5966322    5.3685823
H    -3.9803033   -2.0227268    6.8289944
H    -4.2956408   -5.0651982    3.7824830
H    -5.2653254   -3.8776151    5.7476646
188
(2) [Pt(ppy)(CN)2Ag(PPh3)2]2
C     2.4635674    0.4635421    1.5017597
C    -2.7438288    0.0670264    1.2391636
C     5.3190827    0.2464236    1.8697931
C     5.1041439    0.5563219    3.2220357
H     4.0874547    0.7602886    3.5719202
C     6.1567573    0.6147100    4.1364440
H     5.9502331    0.8603468    5.1839009
C     7.4693264    0.3662690    3.7251719
H     8.2950882    0.4142661    4.4413865
C     7.7189499    0.0610915    2.3922794
H     8.7489447   -0.1292958    2.0748726
C     6.6602044    0.0010121    1.4733252
C     6.8538846   -0.3160079    0.0575116
C     8.0850075   -0.5980257   -0.5498186
H     8.9965426   -0.5844408    0.0497301
C     8.1428878   -0.8956187   -1.9040010
H     9.1041360   -1.1177336   -2.3772432
C     6.9630866   -0.9101392   -2.6474334
H     6.9551798   -1.1454737   -3.7143100
C     5.7729051   -0.6189919   -1.9957686
H     4.8158983   -0.6138223   -2.5234853
C     0.5933758   -3.3494451    2.0174992
C     0.1312921   -2.7140246    0.8581011
H    -0.4332871   -1.7787763    0.9305196
C     0.4041200   -3.2566971   -0.3973586
H     0.0490673   -2.7359329   -1.2912072
C     1.1425908   -4.4345186   -0.5022703
H     1.3642614   -4.8506219   -1.4901754
C     1.6108863   -5.0709582    0.6493020
H     2.2006543   -5.9897251    0.5692358
C     1.3419967   -4.5305403    1.9051703
H     1.7283770   -5.0223850    2.8035984
C     1.6519085   -3.0722285    4.6662659
C     2.8919702   -2.4875712    4.3614552
H     2.9768868   -1.7850017    3.5244618
C     4.0207808   -2.7925977    5.1174841
H     4.9782415   -2.3281889    4.8616703
C     3.9238913   -3.6748021    6.1967653
H     4.8107162   -3.9133884    6.7924620
C     2.6937944   -4.2504311    6.5120289
H     2.6107762   -4.9434304    7.3553182
C     1.5612865   -3.9536066    5.7496747
H     0.6017371   -4.4152826    6.0008932
C     0.9028496    1.2743935    6.7846110
C     1.5405432    0.0398359    6.9647504
H     1.2666784   -0.8132380    6.3350117
C     2.5411458   -0.1068610    7.9245782
H     3.0315437   -1.0774234    8.0450187
C     2.9232096    0.9835470    8.7061526
H     3.7152126    0.8728139    9.4534542
C     2.3030380    2.2203684    8.5241565
H     2.6072603    3.0814191    9.1274225
C     1.2983940    2.3672728    7.5681799
H     0.8254349    3.3435028    7.4229914
C    -1.9674112    1.0910975    6.4432440
C    -2.0681923    1.2019172    7.8358876
H    -1.1899222    1.4793177    8.4267866
C    -3.2816960    0.9491493    8.4767709
H    -3.3476794    1.0350117    9.5658531
C    -4.4047404    0.5844398    7.7341072
H    -5.3544732    0.3829875    8.2394748
C    -4.3098027    0.4655530    6.3465582
H    -5.1825511    0.1614372    5.7596929
C    -3.0976111    0.7111563    5.7032985
H    -3.0158678    0.5907594    4.6159604
C    -0.4571294    3.1739901    5.1149210
C    -1.3773227    4.0694680    5.6725470
H    -2.1336256    3.7096214    6.3766798
C    -1.3364331    5.4221298    5.3304573
H    -2.0617855    6.1142555    5.7695368
C    -0.3755484    5.8902882    4.4348461
H    -0.3439570    6.9516536    4.1694595
C     0.5401417    5.0001744    3.8698299
H     1.2867693    5.3571710    3.1541682
C     0.4949961    3.6470633    4.1991591
H     1.1965652    2.9465966    3.7314902
N     1.5618451    0.6477594    2.2212556
N    -2.0453327    0.1495574    2.1715761
N     5.7180312   -0.3297162   -0.6899183
P     0.2174251   -2.5761155    3.6316553
P    -0.4131271    1.3838036    5.5100360
Ag   -0.1896302   -0.1021035    3.5216983
Pt    3.9709823    0.0967401    0.3578508
C    -2.4635674   -0.4635421   -1.5017597
C     2.7438288   -0.0670264   -1.2391636
C    -5.3190827   -0.2464236   -1.8697931
C    -5.1041439   -0.5563219   -3.2220357
H    -4.0874547   -0.7602886   -3.5719202
C    -6.1567573   -0.6147100   -4.1364440
H    -5.9502331   -0.8603468   -5.1839009
C    -7.4693264   -0.3662690   -3.7251719
H    -8.2950882   -0.4142661   -4.4413865
C    -7.7189499   -0.0610915   -2.3922794
H    -8.7489447    0.1292958   -2.0748726
C    -6.6602044   -0.0010121   -1.4733252
C    -6.8538846    0.3160079   -0.0575116
C    -8.0850075    0.5980257    0.5498186
H    -8.9965426    0.5844408   -0.0497301
C    -8.1428878    0.8956187    1.9040010
H    -9.1041360    1.1177336    2.3772432
C    -6.9630866    0.9101392    2.6474334
H    -6.9551798    1.1454737    3.7143100
C    -5.7729051    0.6189919    1.9957686
H    -4.8158983    0.6138223    2.5234853
C    -0.5933758    3.3494451   -2.0174992
C    -0.1312921    2.7140246   -0.8581011
H     0.4332871    1.7787763   -0.9305196
C    -0.4041200    3.2566971    0.3973586
H    -0.0490673    2.7359329    1.2912072
C    -1.1425908    4.4345186    0.5022703
H    -1.3642614    4.8506219    1.4901754
C    -1.6108863    5.0709582   -0.6493020
H    -2.2006543    5.9897251   -0.5692358
C    -1.3419967    4.5305403   -1.9051703
H    -1.7283770    5.0223850   -2.8035984
C    -1.6519085    3.0722285   -4.6662659
C    -2.8919702    2.4875712   -4.3614552
H    -2.9768868    1.7850017   -3.5244618
C    -4.0207808    2.7925977   -5.1174841
H    -4.9782415    2.3281889   -4.8616703
C    -3.9238913    3.6748021   -6.1967653
H    -4.8107162    3.9133884   -6.7924620
C    -2.6937944    4.2504311   -6.5120289
H    -2.6107762    4.9434304   -7.3553182
C    -1.5612865    3.9536066   -5.7496747
H    -0.6017371    4.4152826   -6.0008932
C    -0.9028496   -1.2743935   -6.7846110
C    -1.5405432   -0.0398359   -6.9647504
H    -1.2666784    0.8132380   -6.3350117
C    -2.5411458    0.1068610   -7.9245782
H    -3.0315437    1.0774234   -8.0450187
C    -2.9232096   -0.9835470   -8.7061526
H    -3.7152126   -0.8728139   -9.4534542
C    -2.3030380   -2.2203684   -8.5241565
H    -2.6072603   -3.0814191   -9.1274225
C    -1.2983940   -2.3672728   -7.5681799
H    -0.8254349   -3.3435028   -7.4229914
C     1.9674112   -1.0910975   -6.4432440
C     2.0681923   -1.2019172   -7.8358876
H     1.1899222   -1.4793177   -8.4267866
C     3.2816960   -0.9491493   -8.4767709
H     3.3476794   -1.0350117   -9.5658531
C     4.4047404   -0.5844398   -7.7341072
H     5.3544732   -0.3829875   -8.2394748
C     4.3098027   -0.4655530   -6.3465582
H     5.1825511   -0.1614372   -5.7596929
C     3.0976111   -0.7111563   -5.7032985
H     3.0158678   -0.5907594   -4.6159604
C     0.4571294   -3.1739901   -5.1149210
C     1.3773227   -4.0694680   -5.6725470
H     2.1336256   -3.7096214   -6.3766798
C     1.3364331   -5.4221298   -5.3304573
H     2.0617855   -6.1142555   -5.7695368
C     0.3755484   -5.8902882   -4.4348461
H     0.3439570   -6.9516536   -4.1694595
C    -0.5401417   -5.0001744   -3.8698299
H    -1.2867693   -5.3571710   -3.1541682
C    -0.4949961   -3.6470633   -4.1991591
H    -1.1965652   -2.9465966   -3.7314902
N    -1.5618451   -0.6477594   -2.2212556
N     2.0453327   -0.1495574   -2.1715761
N    -5.7180312    0.3297162    0.6899183
P    -0.2174251    2.5761155   -3.6316553
P     0.4131271   -1.3838036   -5.5100360
Ag    0.1896302    0.1021035   -3.5216983
Pt   -3.9709823   -0.0967401   -0.3578508
C    -1.1800983   -3.5419633    4.3247604
C    -1.8769764   -2.9900170    5.4094072
C    -1.5905949   -4.7784610    3.8122421
C    -2.9445243   -3.6728709    5.9887137
H    -1.5884095   -2.0066743    5.7970763
C    -2.6681899   -5.4551457    4.3847385
H    -1.0708114   -5.2119450    2.9527844
C    -3.3429070   -4.9081364    5.4758533
H    -3.4764547   -3.2270008    6.8348066
H    -2.9841892   -6.4175277    3.9703173
H    -4.1886759   -5.4411088    5.9214596
C     1.1800983    3.5419633   -4.3247604
C     1.8769764    2.9900170   -5.4094072
C     1.5905949    4.7784610   -3.8122421
C     2.9445243    3.6728709   -5.9887137
H     1.5884095    2.0066743   -5.7970763
C     2.6681899    5.4551457   -4.3847385
H     1.0708114    5.2119450   -2.9527844
C     3.3429070    4.9081364   -5.4758533
H     3.4764547    3.2270008   -6.8348066
H     2.9841892    6.4175277   -3.9703173
H     4.1886759    5.4411088   -5.9214596
120
(3) [Pt(ppy)(CN)2Ag(PPh3)]2
C    -2.8508919   -1.1875360    0.1460675
C    -2.3961631    1.5561260    0.0508831
C    -5.7267225   -0.7352097    0.1631292
C    -5.8920809   -2.1274032    0.2146838
H    -5.0070329   -2.7709766    0.2268340
C    -7.1575233   -2.7133515    0.2466498
H    -7.2507925   -3.8044311    0.2834148
C    -8.3080392   -1.9203698    0.2286222
H    -9.3004660   -2.3802184    0.2534857
C    -8.1810777   -0.5374493    0.1759692
H    -9.0853021    0.0789589    0.1602354
C    -6.9080331    0.0516046    0.1429772
C    -6.7036418    1.4998683    0.0826504
C    -7.7208836    2.4629571    0.0455319
H    -8.7643456    2.1445164    0.0638148
C    -7.4020170    3.8124243   -0.0156400
H    -8.1972423    4.5635444   -0.0450828
C    -6.0609436    4.1942811   -0.0389173
H    -5.7560426    5.2422963   -0.0869562
C    -5.0949757    3.1985868    0.0010055
H    -4.0285157    3.4369758   -0.0146516
C    -1.8779924   -6.5358365    0.9209094
C    -3.0250481   -5.7559848    1.1270141
H    -3.0806459   -4.7460789    0.7033202
C    -4.0838064   -6.2516725    1.8862727
H    -4.9721935   -5.6323457    2.0434639
C    -4.0002032   -7.5218056    2.4576832
H    -4.8274134   -7.9063382    3.0622838
C    -2.8546822   -8.2959836    2.2696718
H    -2.7811062   -9.2879121    2.7260464
C    -1.7964729   -7.8070945    1.5039366
H    -0.8977395   -8.4164702    1.3666764
C    -0.9014933   -6.4249788   -1.8091881
C    -1.8086306   -7.4553801   -2.0833647
H    -2.3512814   -7.9388229   -1.2654640
C    -2.0321461   -7.8615842   -3.3995508
H    -2.7475763   -8.6639096   -3.6043966
C    -1.3522217   -7.2456500   -4.4495567
H    -1.5327690   -7.5632790   -5.4810554
C    -0.4503286   -6.2141212   -4.1835331
H     0.0767682   -5.7178123   -5.0037741
C    -0.2316550   -5.8004543   -2.8715894
H     0.4613359   -4.9757189   -2.6689046
C     0.9600879   -6.7474724    0.3762396
C     1.3939921   -7.9074069   -0.2775555
H     0.8278893   -8.2996505   -1.1280545
C     2.5530351   -8.5603342    0.1435888
H     2.8853312   -9.4638925   -0.3768266
C     3.2855555   -8.0641338    1.2217367
H     4.1930955   -8.5793766    1.5516007
C     2.8616814   -6.9054995    1.8753005
H     3.4355279   -6.5059408    2.7170496
C     1.7103245   -6.2460229    1.4493572
H     1.3950667   -5.3229954    1.9485797
N    -2.1327711   -2.1062468    0.1613319
N    -1.4795588    2.2758526    0.0166325
N    -5.4033452    1.8967797    0.0595697
P    -0.5465579   -5.8232270   -0.1151890
Ag   -0.3790990   -3.4122953    0.0138583
Pt   -4.0116959    0.3503194    0.1082329
C     2.8508919    1.1875360   -0.1460675
C     2.3961631   -1.5561260   -0.0508831
C     5.7267225    0.7352097   -0.1631292
C     5.8920809    2.1274032   -0.2146838
H     5.0070329    2.7709766   -0.2268340
C     7.1575233    2.7133515   -0.2466498
H     7.2507925    3.8044311   -0.2834148
C     8.3080392    1.9203698   -0.2286222
H     9.3004660    2.3802184   -0.2534857
C     8.1810777    0.5374493   -0.1759692
H     9.0853021   -0.0789589   -0.1602354
C     6.9080331   -0.0516046   -0.1429772
C     6.7036418   -1.4998683   -0.0826504
C     7.7208836   -2.4629571   -0.0455319
H     8.7643456   -2.1445164   -0.0638148
C     7.4020170   -3.8124243    0.0156400
H     8.1972423   -4.5635444    0.0450828
C     6.0609436   -4.1942811    0.0389173
H     5.7560426   -5.2422963    0.0869562
C     5.0949757   -3.1985868   -0.0010055
H     4.0285157   -3.4369758    0.0146516
C     1.8779924    6.5358365   -0.9209094
C     3.0250481    5.7559848   -1.1270141
H     3.0806459    4.7460789   -0.7033202
C     4.0838064    6.2516725   -1.8862727
H     4.9721935    5.6323457   -2.0434639
C     4.0002032    7.5218056   -2.4576832
H     4.8274134    7.9063382   -3.0622838
C     2.8546822    8.2959836   -2.2696718
H     2.7811062    9.2879121   -2.7260464
C     1.7964729    7.8070945   -1.5039366
H     0.8977395    8.4164702   -1.3666764
C     0.9014933    6.4249788    1.8091881
C     1.8086306    7.4553801    2.0833647
H     2.3512814    7.9388229    1.2654640
C     2.0321461    7.8615842    3.3995508
H     2.7475763    8.6639096    3.6043966
C     1.3522217    7.2456500    4.4495567
H     1.5327690    7.5632790    5.4810554
C     0.4503286    6.2141212    4.1835331
H    -0.0767682    5.7178123    5.0037741
C     0.2316550    5.8004543    2.8715894
H    -0.4613359    4.9757189    2.6689046
C    -0.9600879    6.7474724   -0.3762396
C    -1.3939921    7.9074069    0.2775555
H    -0.8278893    8.2996505    1.1280545
C    -2.5530351    8.5603342   -0.1435888
H    -2.8853312    9.4638925    0.3768266
C    -3.2855555    8.0641338   -1.2217367
H    -4.1930955    8.5793766   -1.5516007
C    -2.8616814    6.9054995   -1.8753005
H    -3.4355279    6.5059408   -2.7170496
C    -1.7103245    6.2460229   -1.4493572
H    -1.3950667    5.3229954   -1.9485797
N     2.1327711    2.1062468   -0.1613319
N     1.4795588   -2.2758526   -0.0166325
N     5.4033452   -1.8967797   -0.0595697
P     0.5465579    5.8232270    0.1151890
Ag    0.3790990    3.4122953   -0.0138583
Pt    4.0116959   -0.3503194   -0.1082329
194
(4) [Pt(tolpy)(CN)2Cu(PPh3)2]2
Pt   -3.7701601    0.1496152   -0.7016622
Cu    0.5545588   -0.1579666   -3.3442147
P     0.7907611   -2.4545032   -3.7185860
P     0.8427217    1.4200890   -5.0095295
N     1.9397691    0.1247639   -1.8921716
N    -1.2406406    0.0092786   -2.4733481
N    -5.5696821    0.3550331    0.3217450
C     2.6188325    0.0393577   -0.9467088
C    -2.1974293    0.0395286   -1.8074015
C    -5.0387001    0.3029291   -2.2792347
C    -4.7491105    0.2766710   -3.6502776
H    -3.7062521    0.1874864   -3.9730083
C    -5.7419750    0.3572329   -4.6346526
C    -5.3808615    0.3578803   -6.0938833
H    -5.3522737    1.3893964   -6.4932714
H    -6.1182766   -0.2022448   -6.6950206
H    -4.3847325   -0.0836964   -6.2649214
C    -7.0820147    0.4616332   -4.2303909
H    -7.8753518    0.5169857   -4.9832711
C    -7.4097879    0.4930363   -2.8818806
H    -8.4633750    0.5724553   -2.5957951
C    -6.4031070    0.4174366   -1.9079912
C    -6.6704162    0.4566498   -0.4718401
C    -7.9346178    0.6029184    0.1160777
H    -8.8176575    0.6798910   -0.5204146
C    -8.0592350    0.6581844    1.4970255
H    -9.0463273    0.7756379    1.9546400
C    -6.9136806    0.5707551    2.2880940
H    -6.9535121    0.6234889    3.3782966
C    -5.6883842    0.4187600    1.6539689
H    -4.7580829    0.3499776    2.2235068
C    -0.1730229   -3.2064348   -5.0924478
C    -1.5584496   -2.9743457   -5.0942912
H    -2.0118727   -2.3855858   -4.2888619
C    -2.3579997   -3.4836391   -6.1138288
H    -3.4366661   -3.2991831   -6.0974473
C    -1.7847631   -4.2188069   -7.1548740
H    -2.4133404   -4.6167730   -7.9576902
C    -0.4090818   -4.4432296   -7.1658632
H     0.0471774   -5.0197132   -7.9768765
C     0.3946606   -3.9425312   -6.1382943
H     1.4724755   -4.1303119   -6.1522054
C     0.2502651   -3.4708507   -2.2893724
C     0.1870943   -2.8668464   -1.0270815
H     0.4518099   -1.8126614   -0.9108194
C    -0.2303877   -3.5994728    0.0840799
H    -0.2845007   -3.1097047    1.0608225
C    -0.5896173   -4.9391877   -0.0564391
H    -0.9206116   -5.5083836    0.8178812
C    -0.5370814   -5.5466811   -1.3125922
H    -0.8294356   -6.5950915   -1.4298916
C    -0.1236080   -4.8163385   -2.4252856
H    -0.1029385   -5.2939274   -3.4100951
C     2.5168612   -2.9874337   -4.0549868
C     3.1097203   -4.1145890   -3.4730992
H     2.5355258   -4.7349534   -2.7790270
C     4.4339430   -4.4455085   -3.7637883
H     4.8862706   -5.3257142   -3.2964618
C     5.1790685   -3.6594194   -4.6423641
H     6.2166517   -3.9237349   -4.8698228
C     4.5989654   -2.5297934   -5.2221095
H     5.1757957   -1.8982114   -5.9052211
C     3.2812247   -2.1901849   -4.9199473
H     2.8440570   -1.2845189   -5.3540851
C     2.5918203    1.6351062   -5.5365328
C     3.0042078    1.6149781   -6.8743237
H     2.2653778    1.4938198   -7.6718182
C     4.3559152    1.7496755   -7.1990645
H     4.6640215    1.7311385   -8.2492065
C     5.3066129    1.9165261   -6.1932414
H     6.3643741    2.0312500   -6.4503484
C     4.9026576    1.9372236   -4.8561163
H     5.6422729    2.0653517   -4.0592394
C     3.5572082    1.7855939   -4.5277019
H     3.2486559    1.7749318   -3.4770284
C    -0.0541776    1.2161995   -6.6019290
C    -0.2869568   -0.0841638   -7.0673716
H     0.0361952   -0.9421777   -6.4703820
C    -0.9454943   -0.2985119   -8.2781817
H    -1.1206170   -1.3228114   -8.6206203
C    -1.3906487    0.7874664   -9.0316080
H    -1.9160666    0.6219071   -9.9774075
C    -1.1729406    2.0867568   -8.5707991
H    -1.5266359    2.9427544   -9.1540067
C    -0.5081581    2.3015793   -7.3640814
H    -0.3478574    3.3237486   -7.0085505
C     0.3509675    3.1170324   -4.5014657
C    -0.8610429    3.2540289   -3.8088907
H    -1.4425290    2.3639035   -3.5469700
C    -1.3182129    4.5157109   -3.4326013
H    -2.2637748    4.6063104   -2.8897958
C    -0.5640856    5.6519369   -3.7295939
H    -0.9205471    6.6415773   -3.4270544
C     0.6497985    5.5215866   -4.4045431
H     1.2487956    6.4082773   -4.6350858
C     1.1057155    4.2607058   -4.7919549
H     2.0574008    4.1684963   -5.3236456
Pt    3.7701601   -0.1496152    0.7016622
Cu   -0.5545588    0.1579666    3.3442147
P    -0.7907611    2.4545032    3.7185860
P    -0.8427217   -1.4200890    5.0095295
N    -1.9397691   -0.1247639    1.8921716
N     1.2406406   -0.0092786    2.4733481
N     5.5696821   -0.3550331   -0.3217450
C    -2.6188325   -0.0393577    0.9467088
C     2.1974293   -0.0395286    1.8074015
C     5.0387001   -0.3029291    2.2792347
C     4.7491105   -0.2766710    3.6502776
H     3.7062521   -0.1874864    3.9730083
C     5.7419750   -0.3572329    4.6346526
C     5.3808615   -0.3578803    6.0938833
H     5.3522737   -1.3893964    6.4932714
H     6.1182766    0.2022448    6.6950206
H     4.3847325    0.0836964    6.2649214
C     7.0820147   -0.4616332    4.2303909
H     7.8753518   -0.5169857    4.9832711
C     7.4097879   -0.4930363    2.8818806
H     8.4633750   -0.5724553    2.5957951
C     6.4031070   -0.4174366    1.9079912
C     6.6704162   -0.4566498    0.4718401
C     7.9346178   -0.6029184   -0.1160777
H     8.8176575   -0.6798910    0.5204146
C     8.0592350   -0.6581844   -1.4970255
H     9.0463273   -0.7756379   -1.9546400
C     6.9136806   -0.5707551   -2.2880940
H     6.9535121   -0.6234889   -3.3782966
C     5.6883842   -0.4187600   -1.6539689
H     4.7580829   -0.3499776   -2.2235068
C     0.1730229    3.2064348    5.0924478
C     1.5584496    2.9743457    5.0942912
H     2.0118727    2.3855858    4.2888619
C     2.3579997    3.4836391    6.1138288
H     3.4366661    3.2991831    6.0974473
C     1.7847631    4.2188069    7.1548740
H     2.4133404    4.6167730    7.9576902
C     0.4090818    4.4432296    7.1658632
H    -0.0471774    5.0197132    7.9768765
C    -0.3946606    3.9425312    6.1382943
H    -1.4724755    4.1303119    6.1522054
C    -0.2502651    3.4708507    2.2893724
C    -0.1870943    2.8668464    1.0270815
H    -0.4518099    1.8126614    0.9108194
C     0.2303877    3.5994728   -0.0840799
H     0.2845007    3.1097047   -1.0608225
C     0.5896173    4.9391877    0.0564391
H     0.9206116    5.5083836   -0.8178812
C     0.5370814    5.5466811    1.3125922
H     0.8294356    6.5950915    1.4298916
C     0.1236080    4.8163385    2.4252856
H     0.1029385    5.2939274    3.4100951
C    -2.5168612    2.9874337    4.0549868
C    -3.1097203    4.1145890    3.4730992
H    -2.5355258    4.7349534    2.7790270
C    -4.4339430    4.4455085    3.7637883
H    -4.8862706    5.3257142    3.2964618
C    -5.1790685    3.6594194    4.6423641
H    -6.2166517    3.9237349    4.8698228
C    -4.5989654    2.5297934    5.2221095
H    -5.1757957    1.8982114    5.9052211
C    -3.2812247    2.1901849    4.9199473
H    -2.8440570    1.2845189    5.3540851
C    -2.5918203   -1.6351062    5.5365328
C    -3.0042078   -1.6149781    6.8743237
H    -2.2653778   -1.4938198    7.6718182
C    -4.3559152   -1.7496755    7.1990645
H    -4.6640215   -1.7311385    8.2492065
C    -5.3066129   -1.9165261    6.1932414
H    -6.3643741   -2.0312500    6.4503484
C    -4.9026576   -1.9372236    4.8561163
H    -5.6422729   -2.0653517    4.0592394
C    -3.5572082   -1.7855939    4.5277019
H    -3.2486559   -1.7749318    3.4770284
C     0.0541776   -1.2161995    6.6019290
C     0.2869568    0.0841638    7.0673716
H    -0.0361952    0.9421777    6.4703820
C     0.9454943    0.2985119    8.2781817
H     1.1206170    1.3228114    8.6206203
C     1.3906487   -0.7874664    9.0316080
H     1.9160666   -0.6219071    9.9774075
C     1.1729406   -2.0867568    8.5707991
H     1.5266359   -2.9427544    9.1540067
C     0.5081581   -2.3015793    7.3640814
H     0.3478574   -3.3237486    7.0085505
C    -0.3509675   -3.1170324    4.5014657
C     0.8610429   -3.2540289    3.8088907
H     1.4425290   -2.3639035    3.5469700
C     1.3182129   -4.5157109    3.4326013
H     2.2637748   -4.6063104    2.8897958
C     0.5640856   -5.6519369    3.7295939
H     0.9205471   -6.6415773    3.4270544
C    -0.6497985   -5.5215866    4.4045431
H    -1.2487956   -6.4082773    4.6350858
C    -1.1057155   -4.2607058    4.7919549
H    -2.0574008   -4.1684963    5.3236456
194
(5) [Pt(tolpy)(CN)2Ag(PPh3)2]2
Pt   -0.1900765   -3.8975355   -0.9664507
Ag    0.1145808    0.8050852   -3.4468140
P     2.6084073    0.5555612   -3.6246234
P    -1.4720972    1.1627005   -5.3288783
N     0.1682206   -2.4482270    1.8507404
N    -0.4346070   -1.1606259   -2.3885939
N    -0.0719623   -5.8363007   -0.2193386
C     0.0377764   -2.9811934    0.8195343
C    -0.3401864   -2.1859270   -1.8381756
C    -0.3729190   -4.9397696   -2.7009938
C    -0.5331650   -4.4611016   -4.0076933
H    -0.5933644   -3.3802025   -4.1748666
C    -0.6224580   -5.3092968   -5.1204832
C    -0.8312993   -4.7414179   -6.4966169
H    -1.8996076   -4.5109979   -6.6692671
H    -0.5165492   -5.4496289   -7.2819347
H    -0.2758986   -3.7978025   -6.6355215
C    -0.5401879   -6.6945481   -4.9168350
H    -0.6002043   -7.3751205   -5.7725370
C    -0.3839133   -7.2095773   -3.6361694
H    -0.3222080   -8.2949231   -3.5075936
C    -0.3026421   -6.3479824   -2.5333566
C    -0.1465475   -6.8177713   -1.1584484
C    -0.0815519   -8.1608515   -0.7609896
H    -0.1399402   -8.9479193   -1.5145753
C     0.0499649   -8.4852685    0.5814011
H     0.0979221   -9.5336839    0.8910911
C     0.1148583   -7.4604594    1.5257019
H     0.2095613   -7.6651894    2.5946989
C     0.0509354   -6.1490306    1.0766242
H     0.0953364   -5.3032661    1.7674943
C     3.1631600   -0.6734870   -4.8717858
C     2.6357876   -1.9710193   -4.7661932
H     1.9443203   -2.2165714   -3.9519722
C     2.9839498   -2.9512611   -5.6916342
H     2.5674502   -3.9582239   -5.5891585
C     3.8515907   -2.6459777   -6.7436336
H     4.1236309   -3.4161120   -7.4723116
C     4.3697165   -1.3570777   -6.8612154
H     5.0520716   -1.1113779   -7.6812455
C     4.0299861   -0.3734518   -5.9286139
H     4.4474025    0.6333747   -6.0248828
C     3.4054454   -0.0384054   -2.0886691
C     4.6279975   -0.7266066   -2.0906314
H     5.1396142   -0.9331641   -3.0361987
C     5.1858942   -1.1652669   -0.8912925
H     6.1382840   -1.7049064   -0.9016261
C     4.5249765   -0.9304678    0.3163776
H     4.9565314   -1.2837528    1.2582557
C     3.3038211   -0.2579208    0.3234039
H     2.7641225   -0.0885934    1.2594921
C     2.7447002    0.1866500   -0.8744072
H     1.7776477    0.6990407   -0.8606701
C     3.5030198    2.0899379   -4.0855003
C     4.7546202    2.4394442   -3.5638809
H     5.2436058    1.7858068   -2.8355220
C     5.3756704    3.6249669   -3.9575367
H     6.3504684    3.8907037   -3.5368795
C     4.7571717    4.4706630   -4.8782322
H     5.2464796    5.4008332   -5.1837596
C     3.5065621    4.1339618   -5.3974673
H     3.0062458    4.7984997   -6.1085101
C     2.8792597    2.9565173   -4.9946295
H     1.8826731    2.7120053   -5.3797234
C    -1.5152328    2.8994517   -5.9206092
C    -1.4911969    3.9071425   -4.9434885
H    -1.4242879    3.6335430   -3.8838386
C    -1.5344231    5.2485496   -5.3178905
H    -1.5261308    6.0257473   -4.5467495
C    -1.5774687    5.6008981   -6.6682654
H    -1.6028114    6.6552168   -6.9609540
C    -1.5812776    4.6045455   -7.6436482
H    -1.6080712    4.8739137   -8.7041166
C    -1.5547298    3.2588527   -7.2732528
H    -1.5613436    2.4831469   -8.0448985
C    -3.2238783    0.8016643   -4.9197107
C    -4.2919267    1.6162128   -5.3159546
H    -4.1012251    2.5301041   -5.8866593
C    -5.6013967    1.2696019   -4.9800848
H    -6.4292791    1.9141911   -5.2917423
C    -5.8543320    0.1081289   -4.2503385
H    -6.8819360   -0.1613884   -3.9870964
C    -4.7930298   -0.7041537   -3.8470494
H    -4.9814872   -1.6079755   -3.2600694
C    -3.4830848   -0.3567832   -4.1721581
H    -2.6512642   -0.9808713   -3.8261862
C    -1.1865498    0.1739494   -6.8486896
C     0.1295170   -0.1951525   -7.1560194
H     0.9453106    0.0840307   -6.4810687
C     0.4081892   -0.9384256   -8.3024674
H     1.4418803   -1.2231961   -8.5203011
C    -0.6296116   -1.3310217   -9.1478531
H    -0.4145252   -1.9229240  -10.0430106
C    -1.9452865   -0.9788415   -8.8429659
H    -2.7637445   -1.2931109   -9.4981457
C    -2.2242808   -0.2307125   -7.6996501
H    -3.2595870    0.0324795   -7.4619410
Pt    0.1900765    3.8975355    0.9664507
Ag   -0.1145808   -0.8050852    3.4468140
P    -2.6084073   -0.5555612    3.6246234
P     1.4720972   -1.1627005    5.3288783
N    -0.1682206    2.4482270   -1.8507404
N     0.4346070    1.1606259    2.3885939
N     0.0719623    5.8363007    0.2193386
C    -0.0377764    2.9811934   -0.8195343
C     0.3401864    2.1859270    1.8381756
C     0.3729190    4.9397696    2.7009938
C     0.5331650    4.4611016    4.0076933
H     0.5933644    3.3802025    4.1748666
C     0.6224580    5.3092968    5.1204832
C     0.8312993    4.7414179    6.4966169
H     1.8996076    4.5109979    6.6692671
H     0.5165492    5.4496289    7.2819347
H     0.2758986    3.7978025    6.6355215
C     0.5401879    6.6945481    4.9168350
H     0.6002043    7.3751205    5.7725370
C     0.3839133    7.2095773    3.6361694
H     0.3222080    8.2949231    3.5075936
C     0.3026421    6.3479824    2.5333566
C     0.1465475    6.8177713    1.1584484
C     0.0815519    8.1608515    0.7609896
H     0.1399402    8.9479193    1.5145753
C    -0.0499649    8.4852685   -0.5814011
H    -0.0979221    9.5336839   -0.8910911
C    -0.1148583    7.4604594   -1.5257019
H    -0.2095613    7.6651894   -2.5946989
C    -0.0509354    6.1490306   -1.0766242
H    -0.0953364    5.3032661   -1.7674943
C    -3.1631600    0.6734870    4.8717858
C    -2.6357876    1.9710193    4.7661932
H    -1.9443203    2.2165714    3.9519722
C    -2.9839498    2.9512611    5.6916342
H    -2.5674502    3.9582239    5.5891585
C    -3.8515907    2.6459777    6.7436336
H    -4.1236309    3.4161120    7.4723116
C    -4.3697165    1.3570777    6.8612154
H    -5.0520716    1.1113779    7.6812455
C    -4.0299861    0.3734518    5.9286139
H    -4.4474025   -0.6333747    6.0248828
C    -3.4054454    0.0384054    2.0886691
C    -4.6279975    0.7266066    2.0906314
H    -5.1396142    0.9331641    3.0361987
C    -5.1858942    1.1652669    0.8912925
H    -6.1382840    1.7049064    0.9016261
C    -4.5249765    0.9304678   -0.3163776
H    -4.9565314    1.2837528   -1.2582557
C    -3.3038211    0.2579208   -0.3234039
H    -2.7641225    0.0885934   -1.2594921
C    -2.7447002   -0.1866500    0.8744072
H    -1.7776477   -0.6990407    0.8606701
C    -3.5030198   -2.0899379    4.0855003
C    -4.7546202   -2.4394442    3.5638809
H    -5.2436058   -1.7858068    2.8355220
C    -5.3756704   -3.6249669    3.9575367
H    -6.3504684   -3.8907037    3.5368795
C    -4.7571717   -4.4706630    4.8782322
H    -5.2464796   -5.4008332    5.1837596
C    -3.5065621   -4.1339618    5.3974673
H    -3.0062458   -4.7984997    6.1085101
C    -2.8792597   -2.9565173    4.9946295
H    -1.8826731   -2.7120053    5.3797234
C     1.5152328   -2.8994517    5.9206092
C     1.4911969   -3.9071425    4.9434885
H     1.4242879   -3.6335430    3.8838386
C     1.5344231   -5.2485496    5.3178905
H     1.5261308   -6.0257473    4.5467495
C     1.5774687   -5.6008981    6.6682654
H     1.6028114   -6.6552168    6.9609540
C     1.5812776   -4.6045455    7.6436482
H     1.6080712   -4.8739137    8.7041166
C     1.5547298   -3.2588527    7.2732528
H     1.5613436   -2.4831469    8.0448985
C     3.2238783   -0.8016643    4.9197107
C     4.2919267   -1.6162128    5.3159546
H     4.1012251   -2.5301041    5.8866593
C     5.6013967   -1.2696019    4.9800848
H     6.4292791   -1.9141911    5.2917423
C     5.8543320   -0.1081289    4.2503385
H     6.8819360    0.1613884    3.9870964
C     4.7930298    0.7041537    3.8470494
H     4.9814872    1.6079755    3.2600694
C     3.4830848    0.3567832    4.1721581
H     2.6512642    0.9808713    3.8261862
C     1.1865498   -0.1739494    6.8486896
C    -0.1295170    0.1951525    7.1560194
H    -0.9453106   -0.0840307    6.4810687
C    -0.4081892    0.9384256    8.3024674
H    -1.4418803    1.2231961    8.5203011
C     0.6296116    1.3310217    9.1478531
H     0.4145252    1.9229240   10.0430106
C     1.9452865    0.9788415    8.8429659
H     2.7637445    1.2931109    9.4981457
C     2.2242808    0.2307125    7.6996501
H     3.2595870   -0.0324795    7.4619410
126
(6) [Pt(tolpy)(t-CN)(�-CN)Ag(PPh3)]2
Pt   -0.8839805   -2.3020258    2.1644889
Ag   -0.4510435    2.6042278    0.4531916
P     0.1373257    4.7060375    1.5154948
N    -4.0618900   -2.5115044    2.2192998
N    -0.8807225    0.6761639    1.3509101
N    -0.6737326   -4.2920970    2.7469157
C    -2.9049093   -2.3541084    2.2422597
C    -0.9071121   -0.4470088    1.6622840
C     1.1544917   -2.4743043    2.0773093
C     2.1119457   -1.5114553    1.7239631
H     1.7790666   -0.5084516    1.4388161
C     3.4924290   -1.7778650    1.7213301
C     4.4637758   -0.7055148    1.3198950
H     4.2047095   -0.2795113    0.3338857
H     5.4964959   -1.0878540    1.2699952
H     4.4465790    0.1322344    2.0408383
C     3.9215281   -3.0539733    2.1035073
H     4.9917435   -3.2842472    2.1133853
C     3.0036283   -4.0345201    2.4728135
H     3.3755220   -5.0187542    2.7734919
C     1.6317305   -3.7622266    2.4545665
C     0.6075575   -4.7403164    2.8246872
C     0.8573053   -6.0531056    3.2415914
H     1.8849635   -6.4133440    3.3016340
C    -0.1990417   -6.8898366    3.5729406
H    -0.0042163   -7.9162448    3.8975013
C    -1.5038715   -6.4065856    3.4863293
H    -2.3674155   -7.0262662    3.7377511
C    -1.6955949   -5.0975902    3.0672825
H    -2.6929274   -4.6575383    2.9789357
C    -0.5263780    4.8336520    3.2194398
C    -0.7554777    3.6478375    3.9306607
H    -0.5759890    2.6785512    3.4514907
C    -1.2303596    3.6946099    5.2406129
H    -1.4098657    2.7619925    5.7834503
C    -1.4898571    4.9234932    5.8471307
H    -1.8708548    4.9589360    6.8723991
C    -1.2754868    6.1075535    5.1407094
H    -1.4867754    7.0733341    5.6100166
C    -0.7967727    6.0652207    3.8319118
H    -0.6419516    6.9977554    3.2802140
C     1.9489589    4.8861303    1.6929583
C     2.7571754    4.2933326    0.7146886
H     2.3057082    3.7229621   -0.1050327
C     4.1457965    4.4003192    0.7758088
H     4.7427252    3.9194507   -0.0062773
C     4.7371092    5.0957425    1.8303423
H     5.8270453    5.1759872    1.8912348
C     3.9400087    5.6789867    2.8183489
H     4.4043964    6.2135618    3.6528825
C     2.5509552    5.5767863    2.7540297
H     1.9358593    6.0254554    3.5401234
C    -0.4301810    6.2604953    0.7271025
C    -1.7953279    6.3775195    0.4242166
H    -2.4762086    5.5466234    0.6399388
C    -2.2926357    7.5469325   -0.1448847
H    -3.3616515    7.6312699   -0.3637330
C    -1.4295853    8.6055915   -0.4372789
H    -1.8208301    9.5252790   -0.8834524
C    -0.0688297    8.4862326   -0.1603739
H     0.6135239    9.3101877   -0.3910344
C     0.4314156    7.3194825    0.4213865
H     1.4994848    7.2355428    0.6429512
Pt    0.8839805    2.3020258   -2.1644889
Ag    0.4510435   -2.6042278   -0.4531916
P    -0.1373257   -4.7060375   -1.5154948
N     4.0618900    2.5115044   -2.2192998
N     0.8807225   -0.6761639   -1.3509101
N     0.6737326    4.2920970   -2.7469157
C     2.9049093    2.3541084   -2.2422597
C     0.9071121    0.4470088   -1.6622840
C    -1.1544917    2.4743043   -2.0773093
C    -2.1119457    1.5114553   -1.7239631
H    -1.7790666    0.5084516   -1.4388161
C    -3.4924290    1.7778650   -1.7213301
C    -4.4637758    0.7055148   -1.3198950
H    -4.2047095    0.2795113   -0.3338857
H    -5.4964959    1.0878540   -1.2699952
H    -4.4465790   -0.1322344   -2.0408383
C    -3.9215281    3.0539733   -2.1035073
H    -4.9917435    3.2842472   -2.1133853
C    -3.0036283    4.0345201   -2.4728135
H    -3.3755220    5.0187542   -2.7734919
C    -1.6317305    3.7622266   -2.4545665
C    -0.6075575    4.7403164   -2.8246872
C    -0.8573053    6.0531056   -3.2415914
H    -1.8849635    6.4133440   -3.3016340
C     0.1990417    6.8898366   -3.5729406
H     0.0042163    7.9162448   -3.8975013
C     1.5038715    6.4065856   -3.4863293
H     2.3674155    7.0262662   -3.7377511
C     1.6955949    5.0975902   -3.0672825
H     2.6929274    4.6575383   -2.9789357
C     0.5263780   -4.8336520   -3.2194398
C     0.7554777   -3.6478375   -3.9306607
H     0.5759890   -2.6785512   -3.4514907
C     1.2303596   -3.6946099   -5.2406129
H     1.4098657   -2.7619925   -5.7834503
C     1.4898571   -4.9234932   -5.8471307
H     1.8708548   -4.9589360   -6.8723991
C     1.2754868   -6.1075535   -5.1407094
H     1.4867754   -7.0733341   -5.6100166
C     0.7967727   -6.0652207   -3.8319118
H     0.6419516   -6.9977554   -3.2802140
C    -1.9489589   -4.8861303   -1.6929583
C    -2.7571754   -4.2933326   -0.7146886
H    -2.3057082   -3.7229621    0.1050327
C    -4.1457965   -4.4003192   -0.7758088
H    -4.7427252   -3.9194507    0.0062773
C    -4.7371092   -5.0957425   -1.8303423
H    -5.8270453   -5.1759872   -1.8912348
C    -3.9400087   -5.6789867   -2.8183489
H    -4.4043964   -6.2135618   -3.6528825
C    -2.5509552   -5.5767863   -2.7540297
H    -1.9358593   -6.0254554   -3.5401234
C     0.4301810   -6.2604953   -0.7271025
C     1.7953279   -6.3775195   -0.4242166
H     2.4762086   -5.5466234   -0.6399388
C     2.2926357   -7.5469325    0.1448847
H     3.3616515   -7.6312699    0.3637330
C     1.4295853   -8.6055915    0.4372789
H     1.8208301   -9.5252790    0.8834524
C     0.0688297   -8.4862326    0.1603739
H    -0.6135239   -9.3101877    0.3910344
C    -0.4314156   -7.3194825   -0.4213865
H    -1.4994848   -7.2355428   -0.6429512
188
(7) [Pt(F2ppy)(CN)2Cu(PPh3)2]2
C     0.0256976   -0.6743026   -2.6579761
C    -0.2890747    2.0190768   -2.0257084
C    -0.0844680    1.0043505   -6.6225837
C    -0.2267277    2.4140475   -6.2559197
H     0.1873251   -1.7775648   -4.8545239
H    -0.4027074    4.2899535   -3.3878116
C    -0.2725212    2.6956470   -4.8596716
C    -0.3847038    4.0276558   -4.4478435
C    -0.4553653    5.0435797   -5.3902550
C    -0.4210749    4.7986302   -6.7576157
C    -0.3047695    3.4789311   -7.1647952
C    -0.0202275    0.4861576   -7.9251651
C     0.1244194   -0.8808432   -8.1232481
C     0.2040023   -1.7288904   -7.0209588
C     0.1321387   -1.1628556   -5.7562473
N    -0.0070854    0.1546719   -5.5607475
C     3.3202207   -4.1678097   -1.6059136
C     3.4935721   -2.9022447   -2.1849439
H     2.6189631   -2.3326538   -2.5168008
C     4.7698490   -2.3592353   -2.3225385
H     4.8901520   -1.3689816   -2.7717525
C     5.8846787   -3.0657587   -1.8686114
H     6.8858606   -2.6353362   -1.9703577
C     5.7178811   -4.3170445   -1.2752303
H     6.5872912   -4.8724869   -0.9096940
C     4.4424560   -4.8684446   -1.1462035
H     4.3213153   -5.8520842   -0.6830637
C     1.7944085   -6.2986754   -0.4249463
C     1.8137989   -6.0611511    0.9583477
H     1.7178487   -5.0352900    1.3318391
C     1.9402118   -7.1197499    1.8560830
H     1.9403798   -6.9215373    2.9317414
C     2.0364437   -8.4296553    1.3815041
H     2.1262224   -9.2622154    2.0861463
C     2.0098415   -8.6743523    0.0092120
H     2.0808337   -9.6995174   -0.3675891
C     1.8915883   -7.6148259   -0.8919702
H     1.8713878   -7.8164274   -1.9669365
C     1.4120553   -5.5884610   -3.1937848
C     2.4900885   -5.8365070   -4.0542901
H     3.5063795   -5.5739271   -3.7464846
C     2.2757679   -6.4126262   -5.3066835
H     3.1269270   -6.5989583   -5.9691380
C     0.9845831   -6.7513312   -5.7127221
H     0.8193810   -7.2055827   -6.6948528
C    -0.0947557   -6.5055943   -4.8631440
H    -1.1138871   -6.7590212   -5.1704067
C     0.1174889   -5.9213421   -3.6150253
H    -0.7378235   -5.7148135   -2.9644125
C    -3.0835499   -4.7978359   -1.9797598
C    -3.6102760   -6.0717583   -1.7386656
H    -3.5957661   -6.4849289   -0.7258323
C    -4.1621212   -6.8182049   -2.7824500
H    -4.5721903   -7.8120370   -2.5773370
C    -4.2016519   -6.2985234   -4.0750200
H    -4.6436026   -6.8812074   -4.8893074
C    -3.6768721   -5.0276717   -4.3243292
H    -3.7042324   -4.6097338   -5.3355864
C    -3.1143257   -4.2872787   -3.2880223
H    -2.6964170   -3.2954455   -3.4928582
C    -3.3099150   -2.2647594   -0.6908122
C    -4.6613416   -2.2785152   -1.0678563
H    -5.1352135   -3.2159070   -1.3754790
C    -5.4042792   -1.0990479   -1.0666325
H    -6.4570529   -1.1211796   -1.3659213
C    -4.8045571    0.1060003   -0.6964739
H    -5.3829834    1.0350545   -0.7042616
C    -3.4611356    0.1282087   -0.3239410
H    -2.9760865    1.0695662   -0.0499219
C    -2.7170594   -1.0512003   -0.3188382
H    -1.6606932   -1.0210351   -0.0390014
Cu    0.0240055   -3.2851100   -0.8648784
N     0.1176281   -1.6853646   -2.0838553
N    -0.3606653    2.5881943   -1.0097508
P     1.6103336   -4.8393598   -1.5250911
P    -2.2696389   -3.7772958   -0.6825922
Pt   -0.1385015    1.0463219   -3.6889597
C    -0.0256976    0.6743026    2.6579761
C     0.2890747   -2.0190768    2.0257084
C     0.0844680   -1.0043505    6.6225837
C     0.2267277   -2.4140475    6.2559197
H    -0.1873251    1.7775648    4.8545239
H     0.4027074   -4.2899535    3.3878116
C     0.2725212   -2.6956470    4.8596716
C     0.3847038   -4.0276558    4.4478435
C     0.4553653   -5.0435797    5.3902550
C     0.4210749   -4.7986302    6.7576157
C     0.3047695   -3.4789311    7.1647952
C     0.0202275   -0.4861576    7.9251651
C    -0.1244194    0.8808432    8.1232481
C    -0.2040023    1.7288904    7.0209588
C    -0.1321387    1.1628556    5.7562473
C    -3.3202207    4.1678097    1.6059136
C    -3.4935721    2.9022447    2.1849439
H    -2.6189631    2.3326538    2.5168008
C    -4.7698490    2.3592353    2.3225385
H    -4.8901520    1.3689816    2.7717525
C    -5.8846787    3.0657587    1.8686114
H    -6.8858606    2.6353362    1.9703577
C    -5.7178811    4.3170445    1.2752303
H    -6.5872912    4.8724869    0.9096940
C    -4.4424560    4.8684446    1.1462035
H    -4.3213153    5.8520842    0.6830637
C    -1.7944085    6.2986754    0.4249463
C    -1.8137989    6.0611511   -0.9583477
H    -1.7178487    5.0352900   -1.3318391
C    -1.9402118    7.1197499   -1.8560830
H    -1.9403798    6.9215373   -2.9317414
C    -2.0364437    8.4296553   -1.3815041
H    -2.1262224    9.2622154   -2.0861463
C    -2.0098415    8.6743523   -0.0092120
H    -2.0808337    9.6995174    0.3675891
C    -1.8915883    7.6148259    0.8919702
H    -1.8713878    7.8164274    1.9669365
C    -1.4120553    5.5884610    3.1937848
C    -2.4900885    5.8365070    4.0542901
H    -3.5063795    5.5739271    3.7464846
C    -2.2757679    6.4126262    5.3066835
H    -3.1269270    6.5989583    5.9691380
C    -0.9845831    6.7513312    5.7127221
H    -0.8193810    7.2055827    6.6948528
C     0.0947557    6.5055943    4.8631440
H     1.1138871    6.7590212    5.1704067
C    -0.1174889    5.9213421    3.6150253
H     0.7378235    5.7148135    2.9644125
C     3.0835499    4.7978359    1.9797598
C     3.6102760    6.0717583    1.7386656
H     3.5957661    6.4849289    0.7258323
C     4.1621212    6.8182049    2.7824500
H     4.5721903    7.8120370    2.5773370
C     4.2016519    6.2985234    4.0750200
H     4.6436026    6.8812074    4.8893074
C     3.6768721    5.0276717    4.3243292
H     3.7042324    4.6097338    5.3355864
C     3.1143257    4.2872787    3.2880223
H     2.6964170    3.2954455    3.4928582
C     3.3099150    2.2647594    0.6908122
C     4.6613416    2.2785152    1.0678563
H     5.1352135    3.2159070    1.3754790
C     5.4042792    1.0990479    1.0666325
H     6.4570529    1.1211796    1.3659213
C     4.8045571   -0.1060003    0.6964739
H     5.3829834   -1.0350545    0.7042616
C     3.4611356   -0.1282087    0.3239410
H     2.9760865   -1.0695662    0.0499219
C     2.7170594    1.0512003    0.3188382
H     1.6606932    1.0210351    0.0390014
Cu   -0.0240055    3.2851100    0.8648784
N    -0.1176281    1.6853646    2.0838553
N     0.3606653   -2.5881943    1.0097508
P    -1.6103336    4.8393598    1.5250911
P     2.2696389    3.7772958    0.6825922
Pt    0.1385015   -1.0463219    3.6889597
C    -2.7115412   -4.6371230    0.8786554
C    -3.8628489   -4.3434994    1.6197648
C    -1.8289023   -5.6169484    1.3537616
C    -4.1296254   -5.0265281    2.8062491
H    -4.5510176   -3.5661477    1.2755713
C    -2.0997642   -6.3043513    2.5359926
H    -0.9091595   -5.8344024    0.8006404
C    -3.2515759   -6.0083425    3.2651908
H    -5.0283399   -4.7819166    3.3809378
H    -1.3917558   -7.0537923    2.9020191
H    -3.4583588   -6.5354784    4.2017402
C     2.7115412    4.6371230   -0.8786554
C     3.8628489    4.3434994   -1.6197648
C     1.8289023    5.6169484   -1.3537616
C     4.1296254    5.0265281   -2.8062491
H     4.5510176    3.5661477   -1.2755713
C     2.0997642    6.3043513   -2.5359926
H     0.9091595    5.8344024   -0.8006404
C     3.2515759    6.0083425   -3.2651908
H     5.0283399    4.7819166   -3.3809378
H     1.3917558    7.0537923   -2.9020191
H     3.4583588    6.5354784   -4.2017402
H    -0.0839587    1.1639381   -8.7733834
F    -0.5634522    6.3126783   -4.9815132
H     0.0839587   -1.1639381    8.7733834
F     0.5634522   -6.3126783    4.9815132
N     0.0070854   -0.1546719    5.5607475
H    -0.1752939    1.2805742    9.1405786
H    -0.3209383    2.8102168    7.1239458
H     0.3209383   -2.8102168   -7.1239458
H     0.1752939   -1.2805742   -9.1405786
H    -0.4800429    5.6059403   -7.4887492
H     0.4800429   -5.6059403    7.4887492
F    -0.2680221    3.2589976   -8.4855236
F     0.2680221   -3.2589976    8.4855236
188
(8) [Pt(F2ppy)(CN)2Ag(PPh3)2]2
C    -0.5702271    2.6445847   -0.9160446
C    -0.0768342    2.4887895    1.8287944
C    -0.9320746    5.6032910   -1.8872127
C    -0.2773062    5.3845324    2.0350512
C    -0.0058931    6.3098220    4.2488833
C    -0.3633957    7.7861395    2.4288311
C    -0.8433976    8.0208423   -0.6246989
C    -1.1101704    6.7507769   -2.6469965
N    -0.7179357    5.6370323   -0.5657956
F     0.1970400    6.1292215    5.5576824
C    -1.0628281    7.9813739   -1.9953298
C    -0.6697910    6.8276549    0.0940330
C    -0.4341668    6.7092449    1.5333979
C    -0.1495739    7.6126807    3.7867030
C    -0.0646477    5.2085348    3.4067713
C    -3.4479070    0.5088626   -4.8519921
C    -3.8267298    1.1975135   -3.6900443
C    -5.1459574    1.1494589   -3.2434391
C    -6.0950639    0.4006127   -3.9417959
C    -5.7203624   -0.3000463   -5.0880396
C    -4.4025803   -0.2461082   -5.5442791
C    -1.6765765    2.2049243   -6.3563786
C    -0.4458456    2.8505497   -6.5367419
C    -0.3658382    4.0266852   -7.2813638
C    -1.5185340    4.5776693   -7.8422104
C    -2.7501794    3.9486285   -7.6561888
C    -2.8305446    2.7680125   -6.9178522
C    -1.5080672   -0.6720018   -6.6385127
C    -1.6224207   -0.4525816   -8.0166949
C    -1.4541967   -1.5099671   -8.9119419
C    -1.1773001   -2.7925576   -8.4394083
C    -1.0593288   -3.0192815   -7.0665183
C    -1.2147354   -1.9624688   -6.1707428
C     2.9434271    2.3628520   -4.6255375
C     2.4723484    3.5991755   -4.1537940
C     2.7873069    4.7777167   -4.8244524
C     3.5636249    4.7384472   -5.9859208
C     4.0234942    3.5139590   -6.4674053
C     3.7182812    2.3306960   -5.7902632
C     3.2613111    1.0631104   -2.0899990
C     4.4498845    1.7918340   -1.9348339
C     5.0300609    1.9250294   -0.6744998
C     4.4268623    1.3391828    0.4400991
C     3.2420175    0.6188062    0.2933285
C     2.6595916    0.4818469   -0.9661151
N    -0.6594692    1.9321741   -1.8367835
N     0.1268117    1.6023105    2.5600075
P    -1.6974695    0.6496515   -5.3816572
P     2.4295576    0.8576274   -3.7070673
Ag   -0.0488445    0.4907428   -3.5300809
Pt   -0.4091938    3.9493413    0.6085113
C     0.5702271   -2.6445847    0.9160446
C     0.0768342   -2.4887895   -1.8287944
C     0.9320746   -5.6032910    1.8872127
C     0.2773062   -5.3845324   -2.0350512
C     0.0058931   -6.3098220   -4.2488833
C     0.3633957   -7.7861395   -2.4288311
C     0.8433976   -8.0208423    0.6246989
C     1.1101704   -6.7507769    2.6469965
N     0.7179357   -5.6370323    0.5657956
F    -0.1970400   -6.1292215   -5.5576824
C     1.0628281   -7.9813739    1.9953298
C     0.6697910   -6.8276549   -0.0940330
C     0.4341668   -6.7092449   -1.5333979
C     0.1495739   -7.6126807   -3.7867030
C     0.0646477   -5.2085348   -3.4067713
C     3.4479070   -0.5088626    4.8519921
C     3.8267298   -1.1975135    3.6900443
C     5.1459574   -1.1494589    3.2434391
C     6.0950639   -0.4006127    3.9417959
C     5.7203624    0.3000463    5.0880396
C     4.4025803    0.2461082    5.5442791
C     1.6765765   -2.2049243    6.3563786
C     0.4458456   -2.8505497    6.5367419
C     0.3658382   -4.0266852    7.2813638
C     1.5185340   -4.5776693    7.8422104
C     2.7501794   -3.9486285    7.6561888
C     2.8305446   -2.7680125    6.9178522
C     1.5080672    0.6720018    6.6385127
C     1.6224207    0.4525816    8.0166949
C     1.4541967    1.5099671    8.9119419
C     1.1773001    2.7925576    8.4394083
C     1.0593288    3.0192815    7.0665183
C     1.2147354    1.9624688    6.1707428
C    -2.9434271   -2.3628520    4.6255375
C    -2.4723484   -3.5991755    4.1537940
C    -2.7873069   -4.7777167    4.8244524
C    -3.5636249   -4.7384472    5.9859208
C    -4.0234942   -3.5139590    6.4674053
C    -3.7182812   -2.3306960    5.7902632
C    -3.2613111   -1.0631104    2.0899990
C    -4.4498845   -1.7918340    1.9348339
C    -5.0300609   -1.9250294    0.6744998
C    -4.4268623   -1.3391828   -0.4400991
C    -3.2420175   -0.6188062   -0.2933285
C    -2.6595916   -0.4818469    0.9661151
N     0.6594692   -1.9321741    1.8367835
N    -0.1268117   -1.6023105   -2.5600075
P     1.6974695   -0.6496515    5.3816572
P    -2.4295576   -0.8576274    3.7070673
Ag    0.0488445   -0.4907428    3.5300809
Pt    0.4091938   -3.9493413   -0.6085113
C     3.3182349   -0.5058356   -4.5505628
C     4.6250850   -0.8878740   -4.2220356
C     2.6380270   -1.1998648   -5.5606007
C     5.2429569   -1.9362595   -4.9029956
C     3.2603978   -2.2412989   -6.2470862
C     4.5644778   -2.6112972   -5.9183343
C    -3.3182349    0.5058356    4.5505628
C    -2.6380270    1.1998648    5.5606007
C    -4.6250850    0.8878740    4.2220356
C    -3.2603978    2.2412989    6.2470862
C    -5.2429569    1.9362595    4.9029956
C    -4.5644778    2.6112972    5.9183343
H    -5.0501494    3.4375925    6.4467014
H    -0.9596940    4.6094161   -2.3410643
H    -0.8038119    8.9718003   -0.0984888
H     0.0513489    4.2091971    3.8328993
H    -3.0774290    1.7611960   -3.1223638
H    -5.4285584    1.6865944   -2.3330970
H    -7.1287981    0.3558995   -3.5850424
H    -6.4583349   -0.8964916   -5.6334416
H    -4.1147406   -0.8011733   -6.4422624
H     0.4591367    2.4368624   -6.0790619
H     0.6043629    4.5159946   -7.4102958
H    -1.4586109    5.5042956   -8.4217623
H    -3.6584431    4.3804002   -8.0880788
H    -3.8009780    2.2839012   -6.7714251
H    -1.8384648    0.5509986   -8.3952302
H    -1.5407428   -1.3273816   -9.9876261
H    -1.0469209   -3.6201562   -9.1436204
H    -0.8343234   -4.0209811   -6.6884148
H    -1.0971509   -2.1358042   -5.0940360
H     1.8544777    3.6348218   -3.2492431
H     2.4205778    5.7341026   -4.4386625
H     3.8108634    5.6648344   -6.5137781
H     4.6327941    3.4746007   -7.3757864
H     4.0903985    1.3751412   -6.1715411
H     4.9176398    2.2702872   -2.8012494
H     5.9544365    2.5002734   -0.5611102
H     4.8743709    1.4535522    1.4323432
H     2.7483247    0.1748622    1.1624941
H     1.7194987   -0.0693376   -1.0691664
H     0.9596940   -4.6094161    2.3410643
H     0.8038119   -8.9718003    0.0984888
H    -0.0513489   -4.2091971   -3.8328993
H     3.0774290   -1.7611960    3.1223638
H     5.4285584   -1.6865944    2.3330970
H     7.1287981   -0.3558995    3.5850424
H     6.4583349    0.8964916    5.6334416
H     4.1147406    0.8011733    6.4422624
H    -0.4591367   -2.4368624    6.0790619
H    -0.6043629   -4.5159946    7.4102958
H     1.4586109   -5.5042956    8.4217623
H     3.6584431   -4.3804002    8.0880788
H     3.8009780   -2.2839012    6.7714251
H     1.8384648   -0.5509986    8.3952302
H     1.5407428    1.3273816    9.9876261
H     1.0469209    3.6201562    9.1436204
H     0.8343234    4.0209811    6.6884148
H     1.0971509    2.1358042    5.0940360
H    -1.8544777   -3.6348218    3.2492431
H    -2.4205778   -5.7341026    4.4386625
H    -3.8108634   -5.6648344    6.5137781
H    -4.6327941   -3.4746007    7.3757864
H    -4.0903985   -1.3751412    6.1715411
H    -4.9176398   -2.2702872    2.8012494
H    -5.9544365   -2.5002734    0.5611102
H    -4.8743709   -1.4535522   -1.4323432
H    -2.7483247   -0.1748622   -1.1624941
H    -1.7194987    0.0693376    1.0691664
H     5.1595536   -0.3713871   -3.4191761
H     1.6028358   -0.9332608   -5.8010681
H     6.2613174   -2.2322242   -4.6326322
H     2.7135187   -2.7755393   -7.0298721
H     5.0501494   -3.4375925   -6.4467014
H    -1.6028358    0.9332608    5.8010681
H    -5.1595536    0.3713871    3.4191761
H    -2.7135187    2.7755393    7.0298721
H    -6.2613174    2.2322242    4.6326322
H    -1.1977542    8.9139548   -2.5516436
H    -1.2833227    6.6670644   -3.7224490
H     1.2833227   -6.6670644    3.7224490
H     1.1977542   -8.9139548    2.5516436
H    -0.0994698    8.4700675    4.4590618
H     0.0994698   -8.4700675   -4.4590618
F     0.5033026   -9.0472906   -1.9993206
F    -0.5033026    9.0472906    1.9993206
